1 **Article Summary Line:** Ultraviolet C at a dose of 1.5 J/cm<sup>2</sup> is effective at decontaminating  
2 SARS-CoV-2 on some types/models of N95 respirators.

3 **Running Title:** UVC Decontamination of SARS-CoV-2 N95 Respirators

4 **Key Words:** Ultraviolet C; N95; decontamination; SARS-Co-V2; healthcare personnel;  
5 pandemic; reuse; filtering facepiece respirators; ultraviolet germicidal irradiation; COVID-19

6 **Title:** The Effect of Ultraviolet C Radiation Against SARS-CoV-2 Inoculated N95  
7 Respirators

8 **Authors:**

9 David M. Ozog, Jonathan Z. Sexton, Shanthi Narla, Carla D. Pretto-Kernahan, Carmen  
10 Mirabelli, Henry W. Lim, Iltefat H. Hamzavi, Robert J. Tibbetts, and Qing-Sheng Mi

11 **Affiliations:**

12 Henry Ford Health System, Detroit, Michigan, USA (D. Ozog, S. Narla, H. Lim, I. Hamzavi, R.  
13 Tibbetts, Q. Mi)

14 University of Michigan Medical School, Ann Arbor, Michigan, USA (J. Sexton, C. Pretto-  
15 Kernahan, C. Mirabelli)

16 University of Michigan College of Pharmacy, Ann Arbor, Michigan, USA (J. Sexton)

17 University of Michigan Center for Drug Repurposing, Ann Arbor, Michigan, USA (J. Sexton)

18

19

20

21

22

23

24 **Abstract**

25           Since March 31<sup>st</sup> 2020, during the height of the pandemic, we have decontaminated  
26 thousands of 3M 1860 respirators with Ultraviolet C (UVC) for our frontline workers. There is  
27 no published peer-reviewed data regarding the dose required to effectively disinfect SARS-CoV-  
28 2 on N95 filtering facepiece respirators (FFRs). Four different locations (facepiece and strap) on  
29 5 different N95 FFR models (3M 1860, 8210, 8511, 9211; Moldex 1511) were inoculated with a  
30 10  $\mu$ L drop of SARS-CoV-2 viral stock ( $8 \times 10^7$  TCID<sub>50</sub>/mL). The outside-facing and wearer-  
31 facing surfaces of the respirators were each irradiated with a dose of 1.5 J/cm<sup>2</sup> UVC (254 nm).  
32 Viable SARS-CoV-2 was quantified by a median tissue culture infectious dose assay (TCID<sub>50</sub>).  
33 UVC delivered using a dose of 1.5 J/cm<sup>2</sup>, to each side, was an effective method of  
34 decontamination for the facepieces of 3M 1860 and Moldex 1511, and for the straps of 3M 8210  
35 and the Moldex 1511. This dose is an appropriate decontamination method to facilitate reuse of  
36 respirators for healthcare personnel when applied to certain models/materials. Increasing the  
37 dose may improve decontamination for the other models and straps; however, UVC radiation can  
38 degrade certain polymers in a dose dependent manner, and the effects may vary greatly between  
39 different models. Therefore, fit-testing of UVC decontaminated respirators must be performed  
40 each time a new model and/or dose is introduced into the healthcare system.

41

42

43

44

45

46

## 47 **Introduction**

48           The shortage of personal protective equipment (PPE) is affecting healthcare workers  
49 worldwide during the coronavirus disease 2019 (COVID-19) pandemic. The ability to  
50 decontaminate and reuse N95 filtering facepiece respirators (FFRs) is a partial solution to the  
51 current shortage.(1) We recently proposed decontaminating respirators with repurposed  
52 dermatology office phototherapy devices, which serve as a platform for ultraviolet C (UVC)  
53 germicidal disinfection.(2) On March 31<sup>st</sup>, during the height of the pandemic, Henry Ford Health  
54 System (HFHS) began decontaminating 3M 1860 respirators with UVC and returning them to  
55 their original users. Since then, several thousand respirators have been decontaminated.

56           Previous studies have shown that UVC can inactivate other coronaviruses including  
57 Severe Acute Respiratory Syndrome coronavirus (SARS-CoV) and Middle East Respiratory  
58 Syndrome coronavirus (MERS-CoV).(3, 4) However, there is no peer-reviewed published data  
59 showing the effective disinfection of the causative agent of COVID-19, SARS-CoV-2 by UVC,  
60 on intact N95 filtering facepiece respirators (FFRs). Consequently, this was causing significant  
61 anxiety in our frontline workers using decontaminated PPE.

62           The objective of this study was to determine the effect of UVC on decontamination of  
63 SARS-CoV-2-innoculated N95 respirators using a variety of FFRs that are available to  
64 healthcare employees at Henry Ford Health System (HFHS) in Detroit, MI.

## 65 **Methods**

66           The study was performed as a collaboration between the HFHS and the University of  
67 Michigan. All study procedures were approved and conducted according to the University of  
68 Michigan Institutional Biosafety Committee BSL3 (Biosafety Level 3). The appropriate training  
69 and medical surveillance for experimental procedures and manipulations performed in the BSL3

70 facility were satisfied by all individuals directly involved in laboratory testing at University of  
71 Michigan.

## 72 **Virus and Preparation of Viral Stocks**

73 The SARS-CoV-2 strain used was USA-WA1/2020 NR-52281. Viral stocks of SARS-  
74 COV-2 were obtained from the Biodefense and Emerging Infections Research Resources  
75 Repository and were propagated in Vero-E6 cells grown in Dulbecco's Modified Eagle Medium  
76 (DMEM) without phenol red, with 2% Fetal Bovine Serum (FBS), L-glutamine,  
77 penicillin/streptomycin, non-essential amino acids, and hydroxyethyl piperazineethanesulfonic  
78 acid (HEPES). The virus stock was purposely produced in a phenol red-free medium to avoid  
79 photodegradation or photooxidation that may affect the results. For stock virus titration, aliquots  
80 of viral stock were applied on confluent Vero-E6 cells in 96-well plates for a 50% tissue culture  
81 infectious dose (TCID<sub>50</sub>) assay. Viral stocks were determined to be  $8 \times 10^7$  TCID<sub>50</sub>/mL.

## 82 **Test respirators and UVGI device**

83 Respirators were tested 100% intact and included the following models: 3M 1860 (St.  
84 Paul, MN); 3M 8210 (St. Paul, MN); Moldex 1511 (Culver City, CA); 3M 8511 (St. Paul, MN);  
85 and 3M 9211 (St. Paul, MN). The ultraviolet germicidal irradiation device (UVGI) was  
86 manufactured by Daavlin (Byron, OH), with custom dimensions (22 in. x 10 in. x 8 in) to fit  
87 under the BSL3 biosafety hood. The irradiance of the device was approximately  $22 \text{ mW/cm}^2$  at  
88 the level of the surface where the masks were placed during the irradiation. Other than  
89 dimensions and a slightly higher irradiance, this UVGI device is identical to the devices used by  
90 HFHS to decontaminate respirators for frontline healthcare personnel. Prior to initiating the  
91 experiment, the irradiance of the device was measured, and a built-in dosimeter was calibrated to  
92 adjust the irradiation.

93 **Decontamination studies**

94 Intact FFRs in a donned position were inoculated on the outside-facing surface with a  
95 single 10  $\mu$ L drop of viral stock ( $8 \times 10^7$  TCID<sub>50</sub>/mL) on 4 areas to account for differing received  
96 doses on complex surfaces: nosepiece, apex, chin-piece, and strap (**Figure 1A**). Inoculated  
97 respirators were dried in a biosafety cabinet at room temperature for 40 minutes. For each N95  
98 respirator model, FFRs were UVC-irradiated or left untreated as positive controls for viral load  
99 recovery. The respirators were then placed under the UVGI device and were individually treated  
100 with a dose of 1.5 J/cm<sup>2</sup>. Then, they were rotated and the wearer-facing side of the N95 was  
101 again irradiated with 1.5 J/cm<sup>2</sup>. The irradiation time for each side was approximately 60-70  
102 seconds. The device does not generate any heat; as such, all FFRs were exposed to UVC at room  
103 temperature. Immediately after the completion of the irradiation, 4 mm circles containing the  
104 inoculated surface were obtained with a leather belt eyelet hole punch tool and were placed in  
105 300  $\mu$ L (microliters) of PBS for 1 hour at room temperature.

106 Recovered viral loads were determined by TCID<sub>50</sub> assay of the absorbed samples.  
107 Briefly, 25  $\mu$ L aliquots of serially 10-fold diluted samples were inoculated into 96-well plates  
108 with a Vero-E6 cell monolayer in sextuplicate and cultured in DMEM with 2% FBS, L-  
109 glutamine, penicillin/streptomycin, non-essential amino acids, and HEPES. The plates were  
110 observed for cytopathic effects for 4 days. Viral titer was calculated with the Reed and Muench  
111 endpoint method.(5) Viral yields were expressed as total TCID<sub>50</sub> recovered in 300  $\mu$ L or TCID<sub>50</sub>/  
112 4mm punch. TCID<sub>50</sub> negative controls were cells with media only and were included on each  
113 plate assayed. All negative controls had no cytopathic effect (CPE). The limit of detection (LOD)  
114 for the TCID<sub>50</sub> assay was determined to be  $10^{1.3}$  TCID<sub>50</sub>/ 4 mm punch. If the amount of viral  
115 particles was below the LOD, then a theoretical, yet low content of viruses may be present.(6)

116 However, an absence of CPE in the Vero E6 cells at 4 days post inoculation indicates a loss of  
117 infectivity and is evidence of inactivation of the SARS-CoV-2 samples (**Figure 1B**).(6)

## 118 **Results**

119 Following preliminary testing (**Appendix Figure 1, Appendix Table 1**), virus  
120 inoculation was performed on all 5 types of respirators. For each type, three were irradiated with  
121 UVC, and one was not irradiated to serve as positive control. Similar results were seen for the  
122 3M 1860 respirators as in the preliminary study. All facepiece locations were below the LOD  
123 with absent CPE. Two straps were above the LOD, and one strap was below the LOD with  
124 absent CPE. Sufficient virus ( $\leq 1$  log reduction) was recovered from the untreated positive  
125 controls on all facepiece locations; however, a lower yield was recovered from the untreated  
126 control strap (**Figure 2, Appendix Table 2**).

127 On the 3M 8210 respirators, location 1 had two respirators above the LOD, and one  
128 respirator below the LOD with absent CPE. Location 2 had one FFR at the LOD, and two FFRs  
129 below the LOD with absent CPE. Location 3 and all the straps were below the LOD with absent  
130 CPE. Lower virus yields were recovered from the untreated positive control on all facepiece  
131 locations. In contrast, the strap did not absorb the droplet and a sufficient yield was obtained.  
132 (**Figure 2, Appendix Table 2**). Of note, the amount of virus recovered from the strap on the  
133 untreated positive control was higher than the untreated control virus stock (10  $\mu$ L in PBS  
134 control). This could have been due to a loss of viral titer of the stock as the control sat in PBS  
135 solution for an hour during the experiment.

136 On the Moldex 1511, all facepiece locations and straps were below the LOD with absent  
137 CPE. However, there was a lower virus recovery from certain facepiece locations (1 and 3) on  
138 the untreated positive respirator (**Figure 2, Appendix Table 2**).

139 For the 3M 8511 and 3M 9211, locations 1 and 2 had FFRs all below the LOD with  
140 absent CPE. Location 3 had one FFR at the LOD, and two respirators below the LOD with  
141 absent CPE. All the straps were above the LOD. All facepiece locations and the strap on the  
142 untreated control had lower virus recovery as compared to the 10  $\mu$ L in PBS control (**Figure 2,**  
143 **Appendix Table 2**).

## 144 **Discussion**

145 Five N95 respirator models were inoculated with SARS-CoV-2 and tested. UVC  
146 delivered using a dose of 1.5 J/cm<sup>2</sup>, to each side, was an effective method of decontamination for  
147 the facepieces of 3M 1860 and Moldex 1511, and for the straps of 3M 8210 and the Moldex  
148 1511. This is consistent with previous results using H1N1 influenza demonstrating that UVC  
149 decontamination is dependent on model and material type. Mills et al(7) and Heimbuch et al(4)  
150 reported 1 J/cm<sup>2</sup> dose may not be adequate to kill H1N1 influenza depending on the N95  
151 respirator used. Mills et al found that only facepieces on 12 of 15 models and straps on 7 of 15  
152 models showed a significant ( $\geq 3$  log) reduction of H1N1 influenza viability. Similarly,  
153 Heimbuch et al found that only facepieces on 11 of 15 models and straps on 4 of 15 models  
154 showed a significant ( $\geq 3$  log) reduction of H1N1 influenza viability.(8)

155 Some respirator models have materials, such as the straps of the 3M 1860, that  
156 demonstrate hydrophilic characteristics when inoculated. Moreover, these seemingly hydrophilic  
157 surfaces showed consistently lower mean log reduction  $< 3 \log_{10}$  TCID<sub>50</sub>.(4) In contrast,  
158 seemingly hydrophobic materials, such as the 3M 1860 facepiece, were found to demonstrate a  $>$   
159  $3 \log_{10}$  TCID<sub>50</sub> reduction.(4) In our study using SARS-CoV-2, we observed similar results with  
160 the 3M 1860 facepiece and strap. Further, the facepieces of the 3M 8210 have hydrophilic  
161 properties which were reflected in the reduced decontamination results, while the straps did not

162 readily absorb the droplets, and hence were adequately disinfected. The Moldex 1511 facepiece  
163 and straps also appeared to be hydrophobic and did not absorb the droplets.

164           Some straps are prone to twisting. Consequently, when the respirator is flipped during  
165 the irradiation process, care must be taken to make sure the appropriate surface of the strap is  
166 exposed to UVC. Also, straps should not inadvertently lay on top of the respirator, hence  
167 creating a shadowing effect. Reduced decontamination seen amongst the straps may not only be  
168 a result of material but secondary to receiving a reduced dosage. UVC devices which provide  
169 360 degrees of irradiation may obviate this issue. Possible respirator-based solutions include a  
170 secondary disinfection step (e.g. Environmental Protection Agency recommended cleansers)  
171 applied only to the straps, or manufacturers may consider using, for example, the same material  
172 as the straps of the 3M 8210 for all the other models of FFRs to improve UVC decontamination.

173           Our dosage for this study was partially based on previous work with Influenza A (H1N1),  
174 Avian influenza A virus (H5N1), Influenza A (H7N9) A/Anhui/1/2013, Influenza A (H7N9)  
175 A/Shanghai/1/2013, MERS-CoV, and SARS-CoV,(4, 7-9) where it was determined that all areas  
176 of a respirator should receive at least  $1 \text{ J/cm}^2$ . Preliminary unpublished data from the  
177 Photomedicine and Photobiology Unit at HFHS demonstrated through theoretical and measured  
178 models that the curvature and the distance of the 3M 1860 N95 respirator from the light source  
179 affected the dosage delivered in a predictable way. Moreover, extrapolating from this model,  
180 after irradiating one side of the respirator with  $1.5 \text{ J/cm}^2$ , some of the lateral aspects may only  
181 receive  $900 \text{ mJ/cm}^2$  while the apex of the respirator may receive almost  $3 \text{ J/cm}^2$ . Further, it was  
182 also observed that a certain percentage of the dosage received in an area ( $\sim 10\%$ ) permeates to the  
183 other side (I. Kohli, unpub. data). Therefore,  $1.5 \text{ J/cm}^2$  was chosen as the lowest irradiance to  
184 ensure that all areas received at least  $1 \text{ J/cm}^2$ . Increasing the dosage delivered may improve



185 decontamination, but UVC radiation can degrade certain polymers in a dose dependent manner,  
186 and the effects may vary greatly between different models.(10) Therefore, fit-testing of UVC  
187 decontaminated respirators must be performed each time a new model and/or dose is introduced  
188 into the healthcare system.(11)

189 Our study sampled different areas of each respirator to ensure that all ranges of dosages  
190 were accounted for in a real-world setting against SARS-CoV-2. Other strengths included the  
191 testing of different model types. Of note, the hydrophilic surfaces (e.g. 3M 8210 facepiece and  
192 3M 1860 strap) of untreated positive controls demonstrated a lower virus recovery than control.  
193 Additional testing was performed to determine if the droplet was drying larger than the 4 mm  
194 area tested. The results showed that there was limited to no virus in the periphery of the 4 mm  
195 area tested, and that no virus could be detected on the wearer-facing surface. Moreover, the  
196 lower yield reflects a diminished ability to resuspend the virus after drying. Limitations of the  
197 study include that no soiling agents were used. However, at Henry Ford Health System, as in  
198 other healthcare facilities, personnel are instructed not to reuse respirators that are visibly soiled.  
199 Further, it is still unclear what the infectious dose is for SARS-CoV-2; therefore, it is unknown if  
200 a significant reduction in viral load eliminates contagious risk.

201 In conclusion, UVC at a dose of  $1.5 \text{ J/cm}^2$  is effective at decontaminating SARS-CoV-2  
202 on some N95 respirators. This dose may only be an appropriate decontamination method to  
203 facilitate reuse of PPE for healthcare personnel when applied to certain models/materials. In  
204 addition, some straps may require additional disinfection to maximize the safety to the frontline  
205 workers. Implementation of widespread UVC decontamination methods requires a careful  
206 consideration of model, material type, design, and fit-testing following irradiation. It should also

207 be emphasized that similar cautions should be practiced for all other methods of respirator  
208 decontamination.

209

210

211

212

213

214

215

216

217

218

219

220

221

222

223

224

225

226

227

228

229

230 **References**

- 231 1. Centers for Disease Control and Prevention. Decontamination and Reuse of Filtering  
232 Facepiece Respirators. 2020 [cited 9 April 2020]; Available from:  
233 [https://www.cdc.gov/coronavirus/2019-ncov/hcp/ppe-strategy/decontamination-reuse-](https://www.cdc.gov/coronavirus/2019-ncov/hcp/ppe-strategy/decontamination-reuse-respirators.html)  
234 [respirators.html](https://www.cdc.gov/coronavirus/2019-ncov/hcp/ppe-strategy/decontamination-reuse-respirators.html)
- 235 2. Hamzavi IH, Lyons AB, Kohli I, Narla S, Parks-Miller A, Gelfand JM, et al. Ultraviolet  
236 germicidal irradiation: possible method for respirator disinfection to facilitate reuse  
237 during COVID-19 pandemic. *J Am Acad Dermatol*. 2020 Apr 1.
- 238 3. Bedell K, Buchaklian AH, Perlman S. Efficacy of an Automated Multiple Emitter  
239 Whole-Room Ultraviolet-C Disinfection System Against Coronaviruses MHV and  
240 MERS-CoV. *Infect Control Hosp Epidemiol*. 2016;37(5):598-9.
- 241 4. Heimbuch BK, Harnish, D. Research to Mitigate a Shortage of Respiratory Protection  
242 Devices During Public Health Emergencies. 2019 [cited 9 April 2020]; Available from:  
243 [https://www.ara.com/news/ara-research-mitigate-shortage-respiratory-protection-devices-](https://www.ara.com/news/ara-research-mitigate-shortage-respiratory-protection-devices-during-public-health-emergencies)  
244 [during-public-health-emergencies](https://www.ara.com/news/ara-research-mitigate-shortage-respiratory-protection-devices-during-public-health-emergencies)
- 245 5. Reed LJ, Muench H. A SIMPLE METHOD OF ESTIMATING FIFTY PER CENT  
246 ENDPOINTS<sup>12</sup>. *American Journal of Epidemiology*. 1938;27(3):493-7.
- 247 6. Darnell MER, Taylor DR. Evaluation of inactivation methods for severe acute respiratory  
248 syndrome coronavirus in noncellular blood products. *Transfusion*. 2006;46(10):1770-7.
- 249 7. Mills D, Harnish DA, Lawrence C, Sandoval-Powers M, Heimbuch BK. Ultraviolet  
250 germicidal irradiation of influenza-contaminated N95 filtering facepiece respirators.  
251 *American journal of infection control*. 2018 Jul;46(7):e49-e55.

- 252 8. Narla S, Lyons AB, Kohli I, Torres AE, Parks-Miller A, Ozog DM, et al. The importance  
253 of the minimum dosage necessary for UVC decontamination of N95 respirators during  
254 the COVID-19 pandemic. *Photodermatol Photoimmunol Photomed*. 2020 Apr 14.
- 255 9. N95DECON. Technical Report for UV-C-Based N95 Reuse Risk Management. 2020  
256 [cited 9 April 2020]; Available from:  
257 [https://static1.squarespace.com/static/5e8126f89327941b9453eeef/t/5e854176021146762](https://static1.squarespace.com/static/5e8126f89327941b9453eeef/t/5e8541760211467623b1e4e4/1585791351199/200401_N95DECON_UV_technicalreport_v1.2_final.pdf)  
258 [3b1e4e4/1585791351199/200401\\_N95DECON\\_UV\\_technicalreport\\_v1.2\\_final.pdf](https://static1.squarespace.com/static/5e8126f89327941b9453eeef/t/5e8541760211467623b1e4e4/1585791351199/200401_N95DECON_UV_technicalreport_v1.2_final.pdf)
- 259 10. Torres AE, Lyons AB, Narla S, Kohli I, Parks-Miller A, Ozog D, et al. Ultraviolet-C and  
260 other methods of decontamination of filtering facepiece N-95 respirators during the  
261 COVID-19 pandemic. *Photochemical & photobiological sciences : Official journal of the*  
262 *European Photochemistry Association and the European Society for Photobiology*. 2020  
263 May 15.
- 264 11. Ozog D, Parks-Miller A, Kohli I, Lyons AB, Narla S, Torres AE, et al. The Importance  
265 of Fit-Testing in Decontamination of N95 Respirators: A Cautionary Note. *Journal of the*  
266 *American Academy of Dermatology*.

267

268 Address for correspondence: David M. Ozog, MD, Photomedicine and Photobiology Unit,  
269 Department of Dermatology, Henry Ford Medical Center New Center One, 3031 W. Grand Blvd  
270 Suite 800, Detroit, MI 48202, USA; Phone: 313-916-0412; Fax: 313-916-0609; email:  
271 DOZOG1@hfhs.org

272

273

274

275 Figure 1A. Locations 1-4 (Nosepiece, Apex, Chin, Strap) on models 1860 and 8210

276 \*Similar locations were sampled on each of the five N95 respirators.

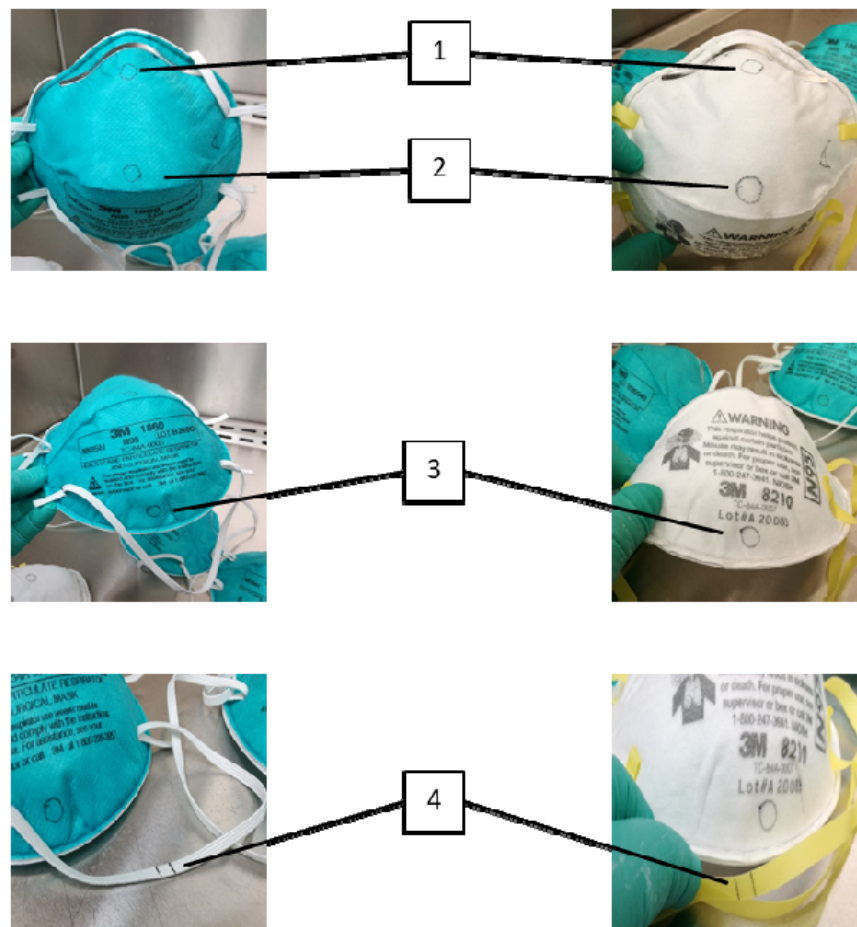

277

278

279

280

281

282

283

284

285

286 Figure 1B. Bright-field microscopy of wells with Vero-E6 cells and SARS-CoV-2

287 \*CPE = cytopathic effect

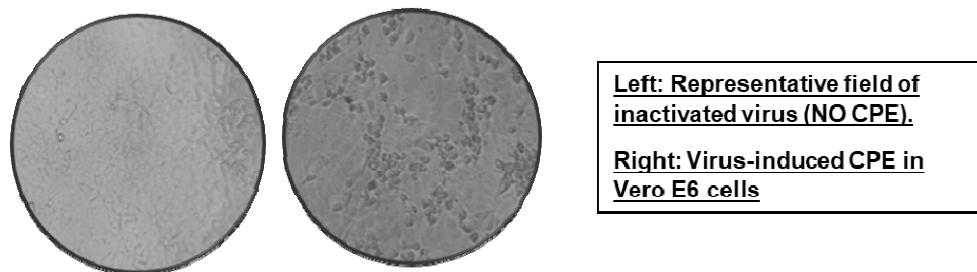

288

289

290

291

292

293

294

295

296

297

298

299

300

301

302

303

304

305

306 Figure 2. Recovered SARS-CoV-2 TCID<sub>50</sub> / 4mm punch

307 \*Wells that were below the limit of detection (LOD) and had no cytopathic effect were

308 arbitrarily assigned the value of zero to represent this phenomenon in the above graphs.

309

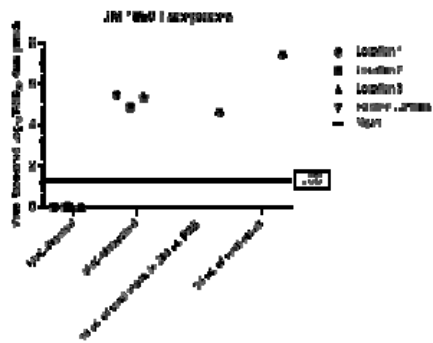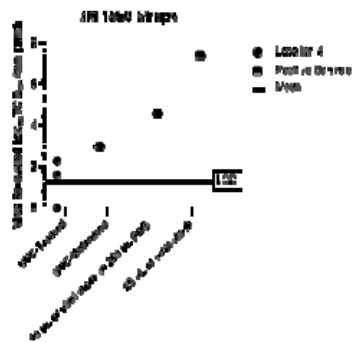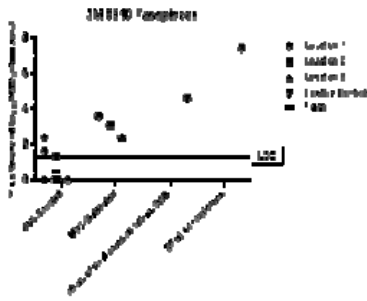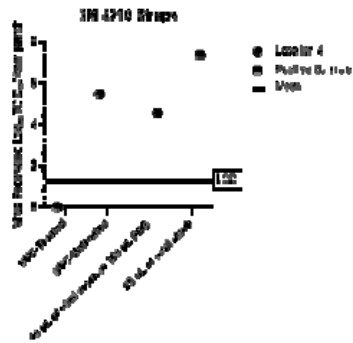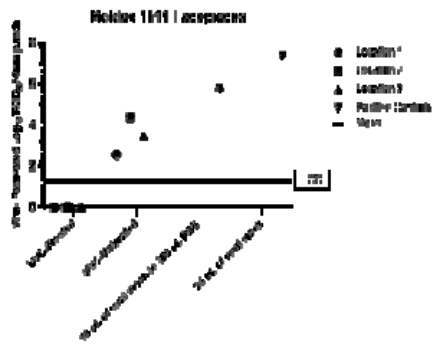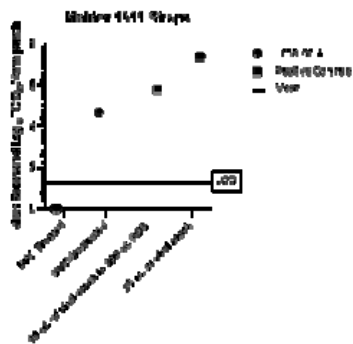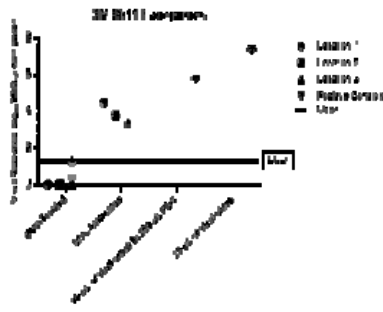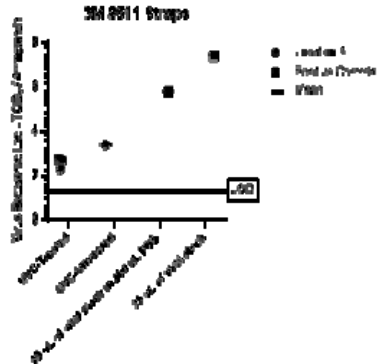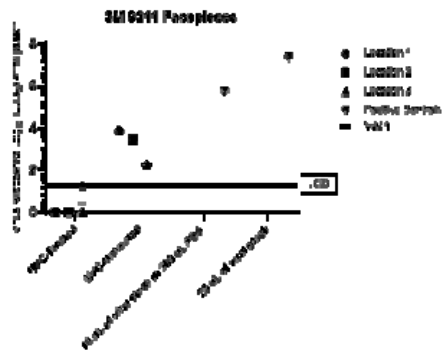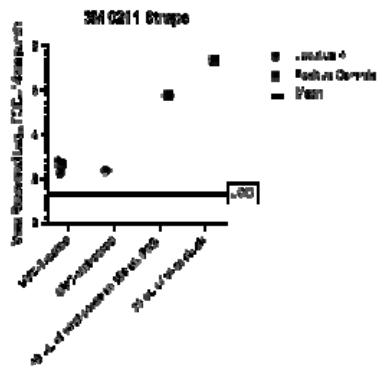



311 **Appendix Figure 1.** Preliminary testing of 3M 1860 N95 respirator

312 \*Wells that were below the limit of detection (LOD) and had no cytopathic effect were

313 arbitrarily assigned the value of zero to represent this phenomenon in the above graphs. SARS-

314 CoV-2 = Severe Acute Respiratory Syndrome coronavirus 2; PBS = phosphate-buffered-saline;

315 TCID<sub>50</sub> = 50% tissue culture infectious dose

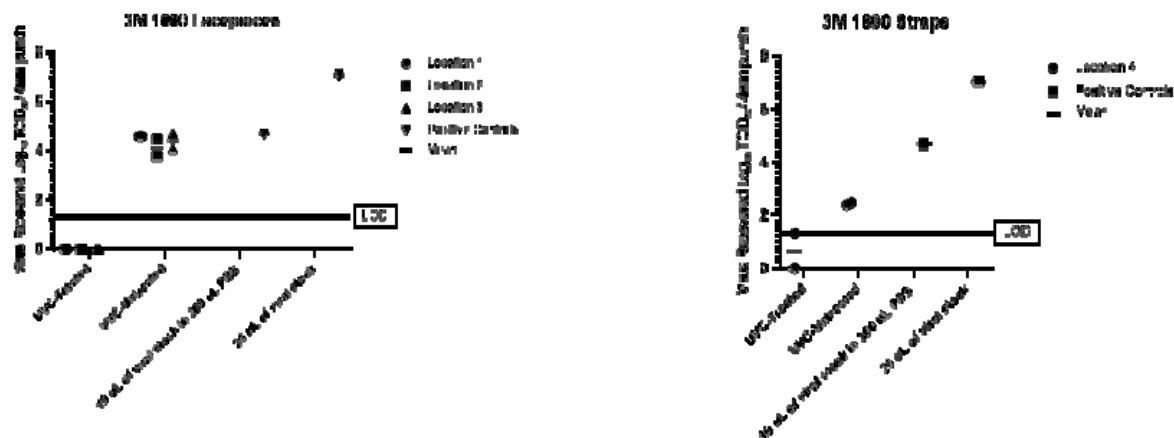

316

317

318

319

320

321

322

323

324

325

326

327

328

329 **Appendix Table 1. Preliminary testing of 3M 1860 N95 respirator**

330 \*SARS-CoV-2 = Severe Acute Respiratory Syndrome coronavirus 2; PBS = phosphate-buffered-

331 saline; TCID<sub>50</sub> = 50% tissue culture infectious dose; LOD = limit of detection.

| Log <sub>10</sub> TCID <sub>50</sub> / 4mm punch (300 μL) | Treated respirator A | Treated respirator B | Untreated respirator A | Untreated respirator B | 10 uL of SARS-CoV-2 stock | SARS-CoV2-stock |
|-----------------------------------------------------------|----------------------|----------------------|------------------------|------------------------|---------------------------|-----------------|
| Location 1                                                | < LOD                | < LOD                | 4.579181246            | 4.579181246            |                           |                 |
| Location 2                                                | < LOD                | < LOD                | 4.479181246            | 3.779181246            |                           |                 |
| Location 3                                                | < LOD                | < LOD                | 4.679181246            | 4.079181246            |                           |                 |
| Location 4                                                | 1.301029996          | < LOD                | 2.479181246            | 2.379181246            |                           |                 |
| 10 μL of SARS-CoV-2 stock diluted in 300 uL of PBS        |                      |                      |                        |                        | 4.679181246               |                 |
| 25 μL of SARS-CoV-2 stock                                 |                      |                      |                        |                        |                           | 7.079181246     |
| Limit of detection                                        | 1.301029996          |                      |                        |                        |                           |                 |

332

333

334

335

336

337

338

339

340

341

342

343

344

345

346

347 **Appendix Table 2. Recovered SARS-CoV-2 Log<sub>10</sub> TCID<sub>50</sub>/ 4mm punch**

348 \*SARS-CoV-2 = Severe Acute Respiratory Syndrome coronavirus 2; PBS = phosphate-buffered-

349 saline; TCID<sub>50</sub> = 50% tissue culture infectious dose; LOD = limit of detection.

| 3M 1860                                                   |                      |                      |                      |                        |                           |                 |
|-----------------------------------------------------------|----------------------|----------------------|----------------------|------------------------|---------------------------|-----------------|
| Log <sub>10</sub> TCID <sub>50</sub> / 4mm punch (300 µL) | Treated respirator A | Treated respirator B | Treated respirator C | Untreated respirator A | 10 uL of SARS-CoV-2 stock | SARS-CoV2-stock |
| Location 1                                                | < LOD                | < LOD                | < LOD                | 5.479181246            |                           |                 |
| Location 2                                                | < LOD                | < LOD                | < LOD                | 4.879181246            |                           |                 |
| Location 3                                                | < LOD                | < LOD                | < LOD                | 5.379181246            |                           |                 |
| Location 4                                                | 1.602059991          | 2.279181246          | < LOD                | 2.979181246            |                           |                 |
| 10 µL of SARS-CoV-2 stock diluted in 300 uL of PBS        |                      |                      |                      |                        | 4.579181246               |                 |
| 25 µL of SARS-CoV-2 stock                                 |                      |                      |                      |                        |                           | 7.379181246     |
| Limit of detection                                        | 1.301029996          |                      |                      |                        |                           |                 |
| 3M 8210                                                   |                      |                      |                      |                        |                           |                 |
| Log <sub>10</sub> TCID <sub>50</sub> / 4mm punch (300 µL) | Treated respirator A | Treated respirator B | Treated respirator C | Untreated respirator A | 10 uL of SARS-CoV-2 stock | SARS-CoV2-stock |
| Location 1                                                | < LOD                | 1.602059991          | 2.379181246          | 3.579181246            |                           |                 |
| Location 2                                                | < LOD                | 1.301029996          | < LOD                | 3.079181246            |                           |                 |
| Location 3                                                | < LOD                | < LOD                | < LOD                | 2.379181246            |                           |                 |
| Location 4                                                | < LOD                | < LOD                | < LOD                | 5.479181246            |                           |                 |
| 10 µL of SARS-CoV-2 stock diluted in 300 uL of PBS        |                      |                      |                      |                        | 4.579181246               |                 |
| 25 µL of SARS-CoV-2 stock                                 |                      |                      |                      |                        |                           | 7.379181246     |
| Limit of detection                                        | 1.301029996          |                      |                      |                        |                           |                 |
| Moldex 1511                                               |                      |                      |                      |                        |                           |                 |
| Log <sub>10</sub> TCID <sub>50</sub> / 4mm punch (300 µL) | Treated respirator A | Treated respirator B | Treated respirator C | Untreated respirator A | 10 uL of SARS-CoV-2 stock | SARS-CoV2-stock |
| Location 1                                                | <LOD                 | < LOD                | < LOD                | 2.579181246            |                           |                 |
| Location 2                                                | < LOD                | < LOD                | < LOD                | 4.379181246            |                           |                 |
| Location 3                                                | < LOD                | < LOD                | < LOD                | 3.479181246            |                           |                 |
| Location 4                                                | < LOD                | < LOD                | < LOD                | 4.679181246            |                           |                 |
| 10 µL of SARS-CoV-2 stock diluted in 300 uL of PBS        |                      |                      |                      |                        | 5.779181246               |                 |
| 25 µL of SARS-CoV-2 stock                                 |                      |                      |                      |                        |                           | 7.379181246     |
| Limit of detection                                        | 1.301029996          |                      |                      |                        |                           |                 |
| 3M 8511                                                   |                      |                      |                      |                        |                           |                 |
| Log <sub>10</sub> TCID <sub>50</sub> / 4mm punch (300 µL) | Treated respirator A | Treated respirator B | Treated respirator C | Untreated respirator A | 10 uL of SARS-CoV-2 stock | SARS-CoV2-stock |
| Location 1                                                | <LOD                 | <LOD                 | <LOD                 | 4.479181246            |                           |                 |

|                                                           |                      |                      |                      |                        |                           |                 |
|-----------------------------------------------------------|----------------------|----------------------|----------------------|------------------------|---------------------------|-----------------|
| Location 2                                                | <LOD                 | <LOD                 | <LOD                 | 3.779181246            |                           |                 |
| Location 3                                                | 1.301029996          | <LOD                 | <LOD                 | 3.379181246            |                           |                 |
| Location 4                                                | 2.279181246          | 2.779181246          | 2.679181246          | 3.379181246            |                           |                 |
| 10 µL of SARS-CoV-2 stock diluted in 300 µL of PBS        |                      |                      |                      |                        | 5.779181246               |                 |
| 25 µL of SARS-CoV-2 stock                                 |                      |                      |                      |                        |                           | 7.379181246     |
| Limit of detection                                        | 1.301029996          |                      |                      |                        |                           |                 |
| 3M 9211                                                   |                      |                      |                      |                        |                           |                 |
| Log <sub>10</sub> TCID <sub>50</sub> / 4mm punch (300 µL) | Treated respirator A | Treated respirator B | Treated respirator C | Untreated respirator A | 10 µL of SARS-CoV-2 stock | SARS-CoV2-stock |
| Location 1                                                | <LOD                 | <LOD                 | <LOD                 | 3.879181246            |                           |                 |
| Location 2                                                | <LOD                 | <LOD                 | <LOD                 | 3.479181246            |                           |                 |
| Location 3                                                | 1.301029996          | <LOD                 | <LOD                 | 2.279181246            |                           |                 |
| Location 4                                                | 2.279181246          | 2.779181246          | 2.679181246          | 2.379181246            |                           |                 |
| 10 µL of SARS-CoV-2 stock diluted in 300 µL of PBS        |                      |                      |                      |                        | 5.779181246               |                 |
| 25 µL of SARS-CoV-2 stock                                 |                      |                      |                      |                        |                           | 7.379181246     |
| Limit of detection                                        | 1.301029996          |                      |                      |                        |                           |                 |

350

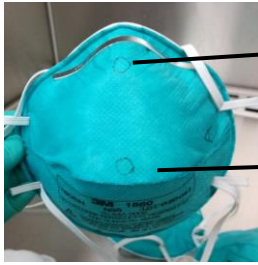

1

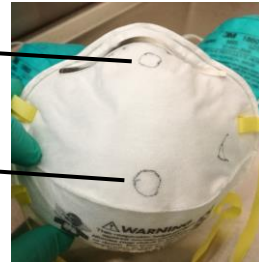

2

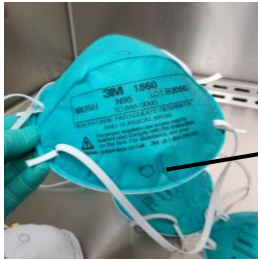

3

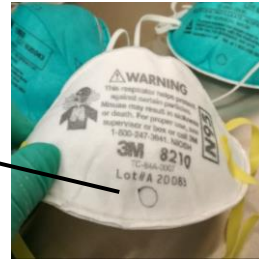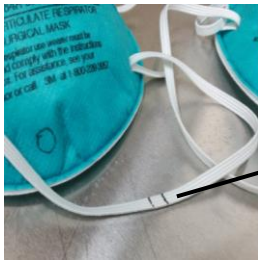

4

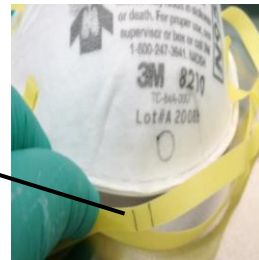

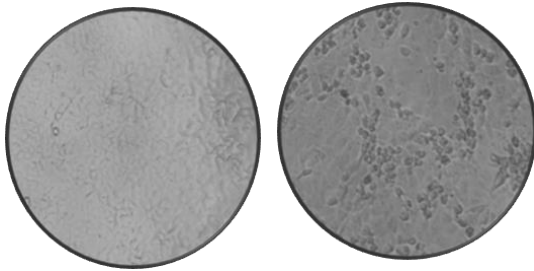

Left: Representative field of inactivated virus (NO CPE).

Right: Virus-induced CPE in Vero E6 cells

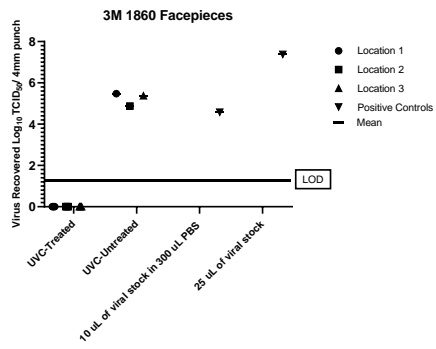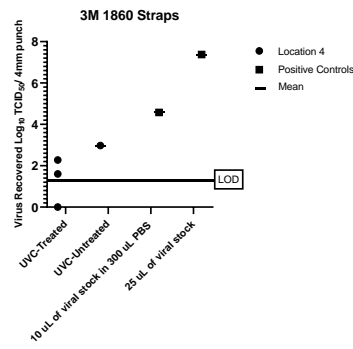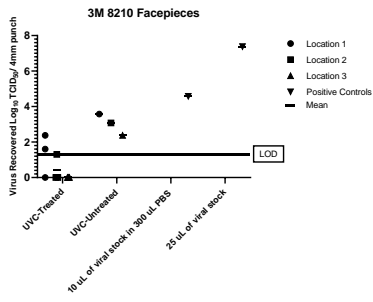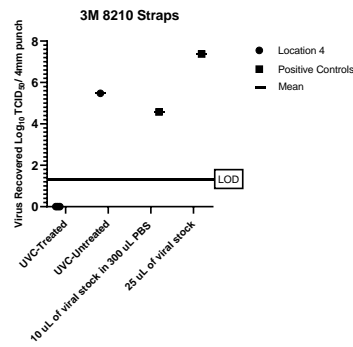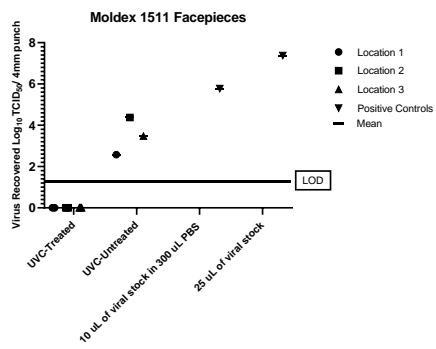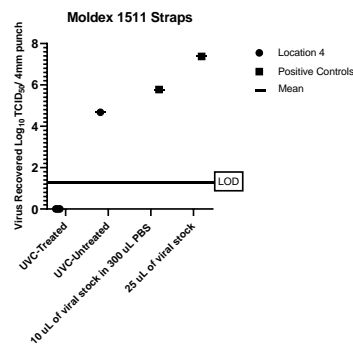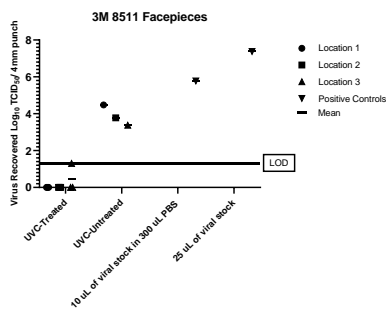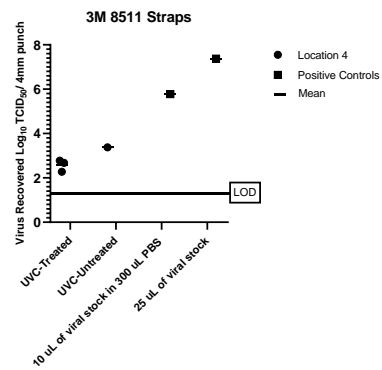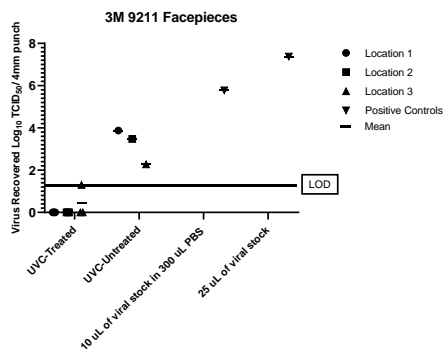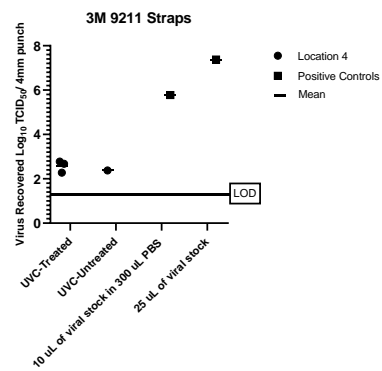

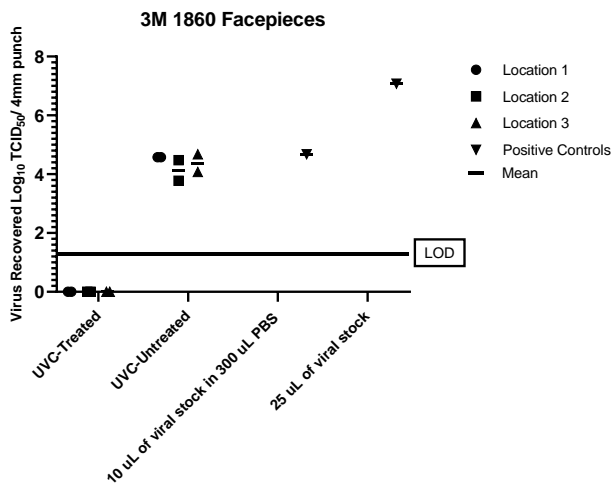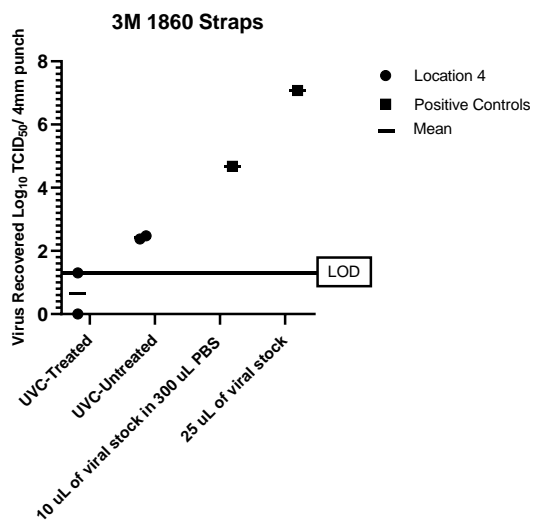

Source: https://www.medrxiv.org/content/10.1101/2020.05.31.20118588v2.full.pdf
